# Supplementary material for: Extensive removal of thallium by graphene oxide functionalized with aza-crown ether
Source: Royal Society of Chemistry journal article supplement (doi:10.1039/d0ra09193f), 2020-01-01
Supplement: d0ra09193f1.pdf [file d0ra09193f1.pdf]

**Extensive removal of thallium by graphene oxide functionalized with aza-  
crown ether**

Shuxin Pan <sup>a,b</sup>, Ting-Zheng Xie <sup>a,c\*</sup>, Tangfu Xiao <sup>a,b\*</sup>, Jiehui Xie <sup>a,c</sup>

<sup>a</sup> Key Laboratory for Water Quality and Conservation of the Pearl River Delta,  
Ministry of Education, Guangzhou University, Guangzhou 510006, China

<sup>b</sup> School of Environmental Science and Engineering, Guangzhou University,  
Guangzhou 510006, China

<sup>c</sup> Institute of Environmental Research at Greater Bay, Guangzhou University,  
Guangzhou 510006, China

Corresponding authors: [xietingzheng@gzhu.edu.cn](mailto:xietingzheng@gzhu.edu.cn) (T-Z Xie); [tfxiao@gzhu.edu.cn](mailto:tfxiao@gzhu.edu.cn)  
(TF Xiao)

Table.S1 Kinetic parameters of FGO for Tl(I) removal fitted by pseudo-first order and pseudo-second order models

| Kinetic model                                                          | Parameters                                     | Initial Tl concentration (mg·L <sup>-1</sup> ) |        |        |
|------------------------------------------------------------------------|------------------------------------------------|------------------------------------------------|--------|--------|
|                                                                        |                                                | 10                                             | 100    | 200    |
| Pseudo-first order model<br>$Q_t = Q_e(1 - e^{-k_1 t})$                | $Q_e$ (mg·g <sup>-1</sup> )                    | 77.10                                          | 311.68 | 449.26 |
|                                                                        | $K_1$ (min <sup>-1</sup> )                     | 9.12                                           | 6.05   | 11.09  |
|                                                                        | $R^2$                                          | 0.994                                          | 0.975  | 0.976  |
| Pseudo-second order model<br>$Q_t = \frac{k_2 q_e^2 t}{1 + q_e k_2 t}$ | $Q_e$ (mg·g <sup>-1</sup> )                    | 81.75                                          | 338.12 | 475.12 |
|                                                                        | $K_2$ (g·mg <sup>-1</sup> ·min <sup>-1</sup> ) | 0.197                                          | 0.026  | 0.043  |
|                                                                        | $R^2$                                          | 0.988                                          | 0.997  | 0.984  |

Where  $Q_e$  and  $Q_t$  represent the adsorption capacity at equilibrium and at time  $t$  (min), respectively;  $k_1$  and  $k_2$  are the pseudo-first and pseudo-second order rate constants, respectively.

Table.S2 Fitting parameters of FGO for Tl(I) removal fitted by the intraparticle diffusion model.

| Tl(I) initial concentration (mg·L <sup>-1</sup> ) | $K_{p1}$ (mg·g <sup>-1</sup> ·min <sup>-1/2</sup> ) | $C$ (mg·L <sup>-1</sup> ) | $R^2$ | $K_{p2}$ (mg·g <sup>-1</sup> ·min <sup>-1/2</sup> ) | $C$ (mg·L <sup>-1</sup> ) | $R^2$ | $K_{p3}$ (mg·g <sup>-1</sup> ·min <sup>-1/2</sup> ) | $C$ (mg·L <sup>-1</sup> ) | $R^2$ |
|---------------------------------------------------|-----------------------------------------------------|---------------------------|-------|-----------------------------------------------------|---------------------------|-------|-----------------------------------------------------|---------------------------|-------|
| 10                                                | 147.04                                              | 0.68                      | 0.99  | 26.67                                               | 54.56                     | 0.83  | 1.659                                               | 75.678                    | 0.98  |
| 100                                               | 514.27                                              | 3.262                     | 0.98  | 199.09                                              | 127.3                     | 0.88  | 20.103                                              | 290.29                    | 0.84  |
|                                                   |                                                     |                           | 8     |                                                     | 8                         |       |                                                     | 7                         |       |

|     |          |       |      |        |       |      |        |        |      |
|-----|----------|-------|------|--------|-------|------|--------|--------|------|
| 200 | 1011.074 | 7.184 | 0.96 | 93.816 | 358.7 | 0.69 | 71.389 | 353.51 | 0.99 |
| 6   |          |       |      |        |       |      |        |        |      |

$K_{p1}, K_{p2}, K_{p3}(\text{mg}\cdot\text{g}^{-1}\cdot\text{min}^{-1/2})$  are the intraparticle diffusion rate coefficient.

Table.S3 The Langmuir, Freundlich and Temkin isotherm parameters for Tl(I) removal by the FGO process.

| Langmuir model                                       |                                   | Freundlich model      |                                   |      | Temkin model                                    |                                   |                                     |       |
|------------------------------------------------------|-----------------------------------|-----------------------|-----------------------------------|------|-------------------------------------------------|-----------------------------------|-------------------------------------|-------|
| $Q_e = \left(\frac{Q_m K_L C_e}{1 + K_L C_e}\right)$ |                                   | $Q_e = K_F C_e^{1/n}$ |                                   |      | $Q_e = \left(\frac{RT}{b}\right) \log(K_T C_e)$ |                                   |                                     |       |
| $Q_{max}$                                            | $K_L$                             | $R^2$                 | $K_F$                             | $n$  | $R^2$                                           | $K_T$                             | $b$                                 | $R^2$ |
| ( $\text{mg}\cdot\text{g}^{-1}$ )                    | ( $\text{L}\cdot\text{mg}^{-1}$ ) |                       | ( $\text{L}\cdot\text{mg}^{-1}$ ) |      |                                                 | ( $\text{L}\cdot\text{mg}^{-1}$ ) | ( $\text{Kj}\cdot\text{mol}^{-1}$ ) |       |
| 2368.59                                              | 0.0015                            | 0.991                 | 17.653                            | 1.53 | 0.990                                           | 0.073                             | 0.0094                              | 0.88  |

Where  $Q_e$  and  $Q_m$  represent the equilibrium and maximum adsorption capacity, respectively;  $C_e$  refers to the equilibrium concentration of sorbate;  $K_L$  is the Langmuir coefficient;  $K_F$  is the Freundlich indicator of the adsorption capacity;  $n$  is the dimensionless heterogeneity factor;  $K_T$  is the Temkin isotherm constant and  $b$  is the Temkin constant related to the heat of adsorption;  $R$  ( $8.314\times 10^{-3} \text{ kJ}\cdot\text{mol}^{-1}\cdot\text{K}^{-1}$ ) denotes as the universal gas constant, and  $T$  is the absolute temperature in Kelvin.
